# Supplementary material for: In situ heating characterization of structural evolution and size-dependent melting point depression in gold nanoclusters: a comprehensive thermodynamic investigation
Source: Royal Society of Chemistry journal article supplement (doi:10.1039/d4nr02111h), 2024-01-01
Supplement: d4nr02111h1.pdf [file d4nr02111h1.pdf]

**Electronic Supplementary Information (ESI)**

**In situ atomic-resolution imaging of structural evolution and size-dependent  
melting point suppression in gold nanoclusters<sup>‡</sup>**

Shengyong Hu,<sup>†a,b</sup> Kuo-Juei Hu,<sup>†a,b,\*</sup> Zixiang Zhao<sup>a,b</sup>; Yongxin Zhang<sup>a,b</sup>; Syed Adil Shah<sup>c</sup>;

Siqi Lu<sup>a,b</sup>; Wuwen Zhu<sup>a,b</sup>; Sichen Tang<sup>a,b</sup>; Fengqi Song<sup>a,b,\*</sup>

<sup>a</sup>National Laboratory of Solid State Microstructures, Collaborative Innovation Center of Advanced Microstructures, School of Physics, Nanjing University, Nanjing 210093, China

<sup>b</sup>Institute of Atom Manufacturing Suzhou Campus, Department, Nanjing University, Nanjing 215163, China

<sup>c</sup>School of Biomedical Engineering, Health Science Centre, Shenzhen University Shenzhen, Guangdong 518060, PR China

<sup>†</sup>These authors contributed equally to this work

<sup>‡</sup>Electronic supplementary information (ESI) available

\*Corresponding authors: kuojuaihu@nju.edu.cn (Kuo-Juei Hu); songfengqi@nju.edu.cn (Fengqi Song)

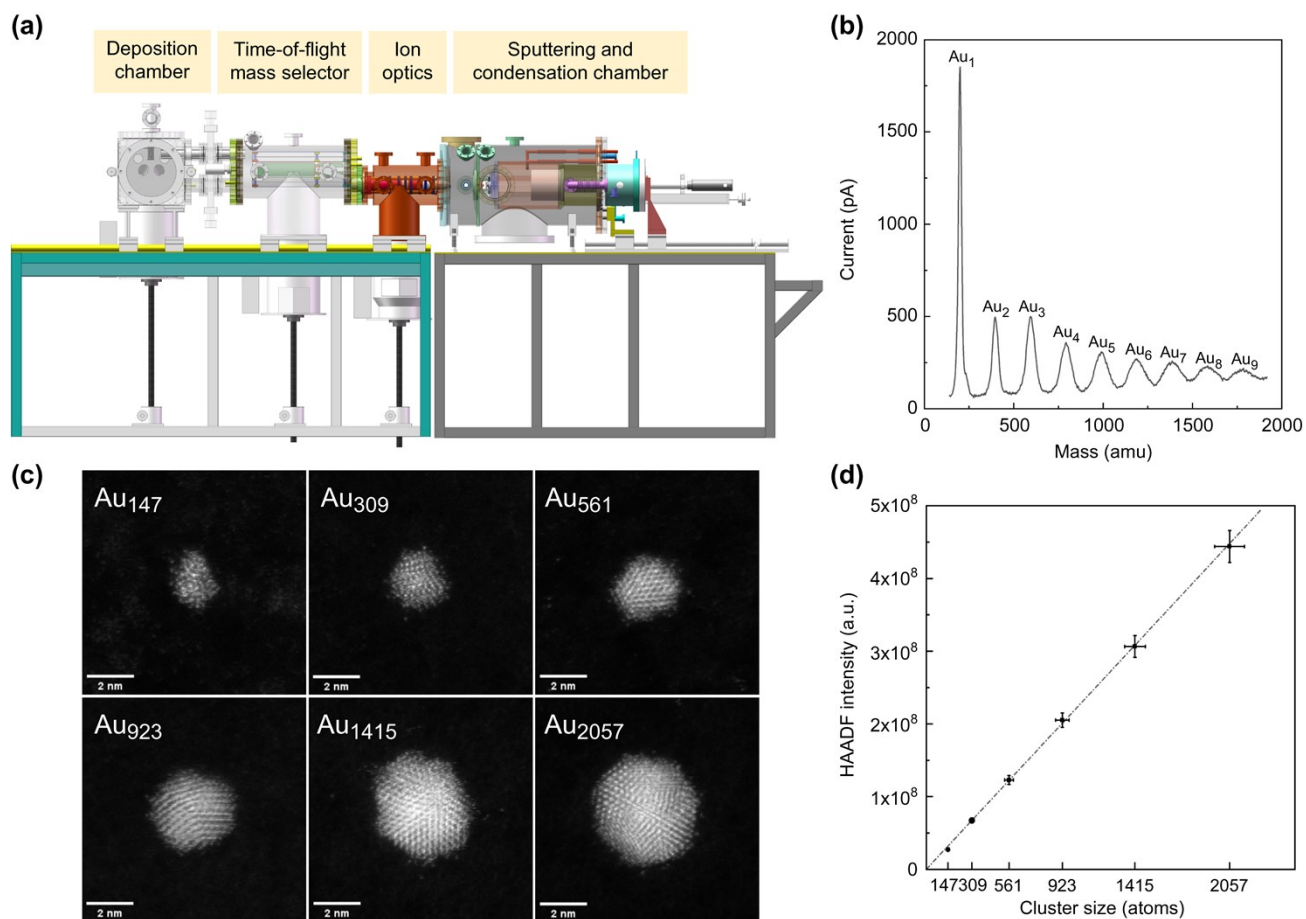

**Figure S1.** (a) Schematic of the cluster beam source that is combined with a magnetron sputtering and gas-phase condensation chamber, ion optics, a time-of-flight mass selector, and a deposition chamber. (b) Mass spectra of the gold clusters. (c) High-resolution HAADF-STEM images of the Au<sub>N</sub> clusters (N = 147, 309, 561, 923, 1415, and 2057). (d) Integrated HAADF intensities of the Au<sub>N</sub> clusters as a function of the corresponding of cluster size (N = 147, 309, 561, 923, 1415, and 2057).

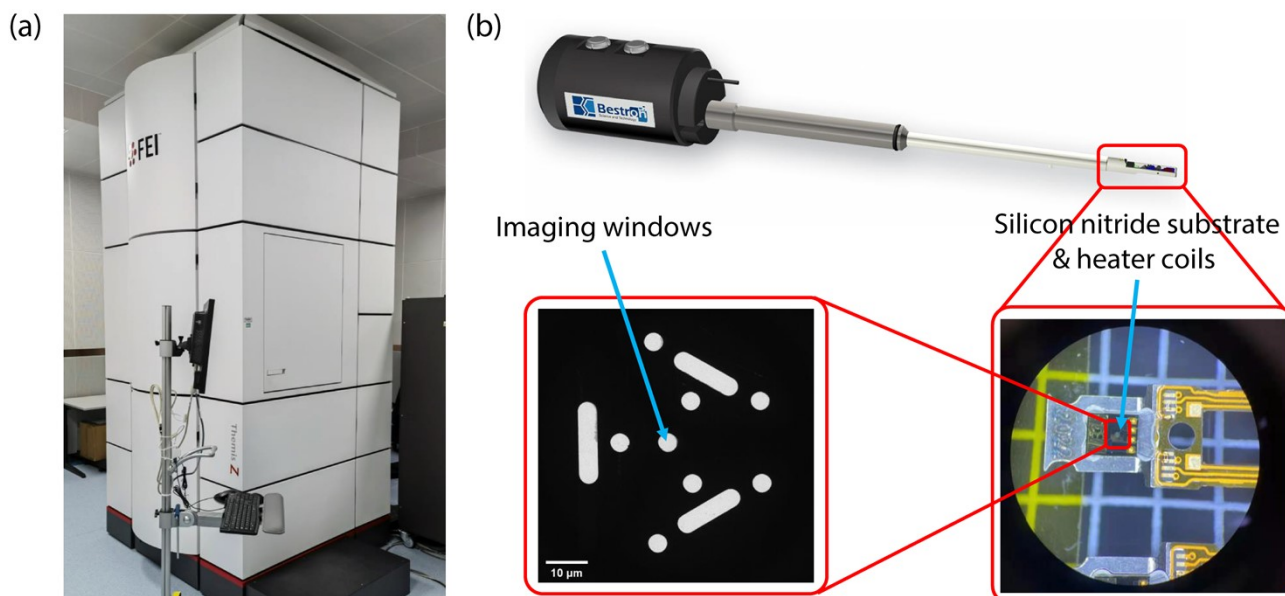

**Figure S2.** (a) Aberration-corrected scanning transmission electron microscope (200 kV FEI Themis Z) at the National Graphene Products Quality Inspection and Testing Center in Wuxi, China. (b) Double-tilt in situ heating holder coupled with in situ heating chip.

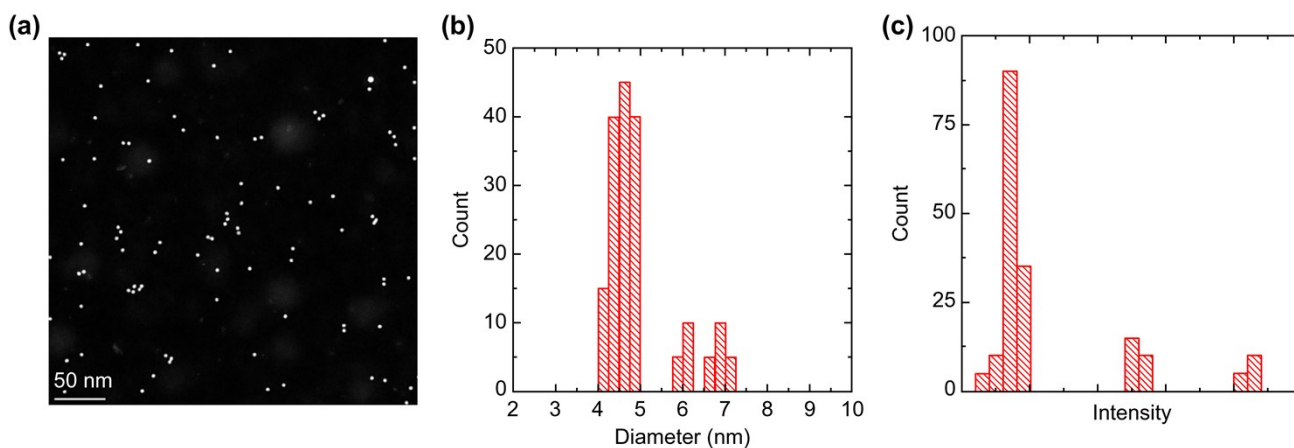

**Figure S3.** (a) HAADF-STEM image of the  $\text{Au}_{2057}$  clusters. The corresponding size distribution and HAADF intensity statistics are depicted in parts (b) and (c), respectively.

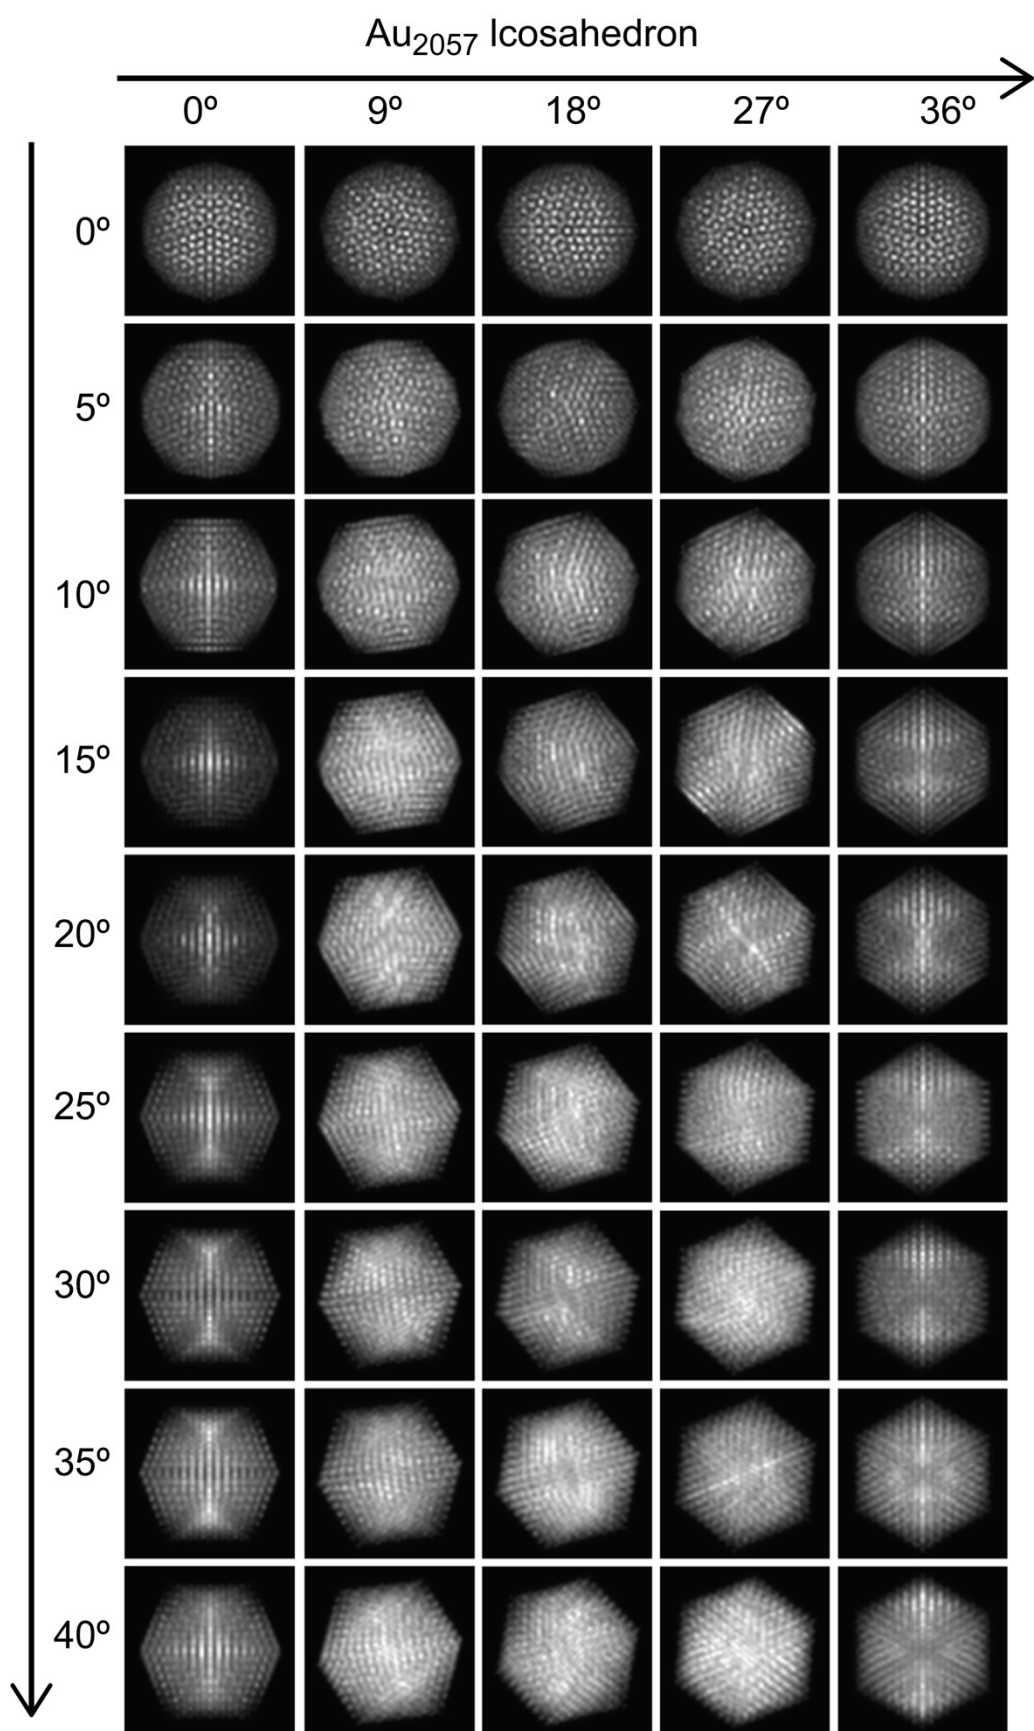

**Figure S4.** QSTEM simulated atlas of the Au<sub>2057</sub> icosahedron (Ih).

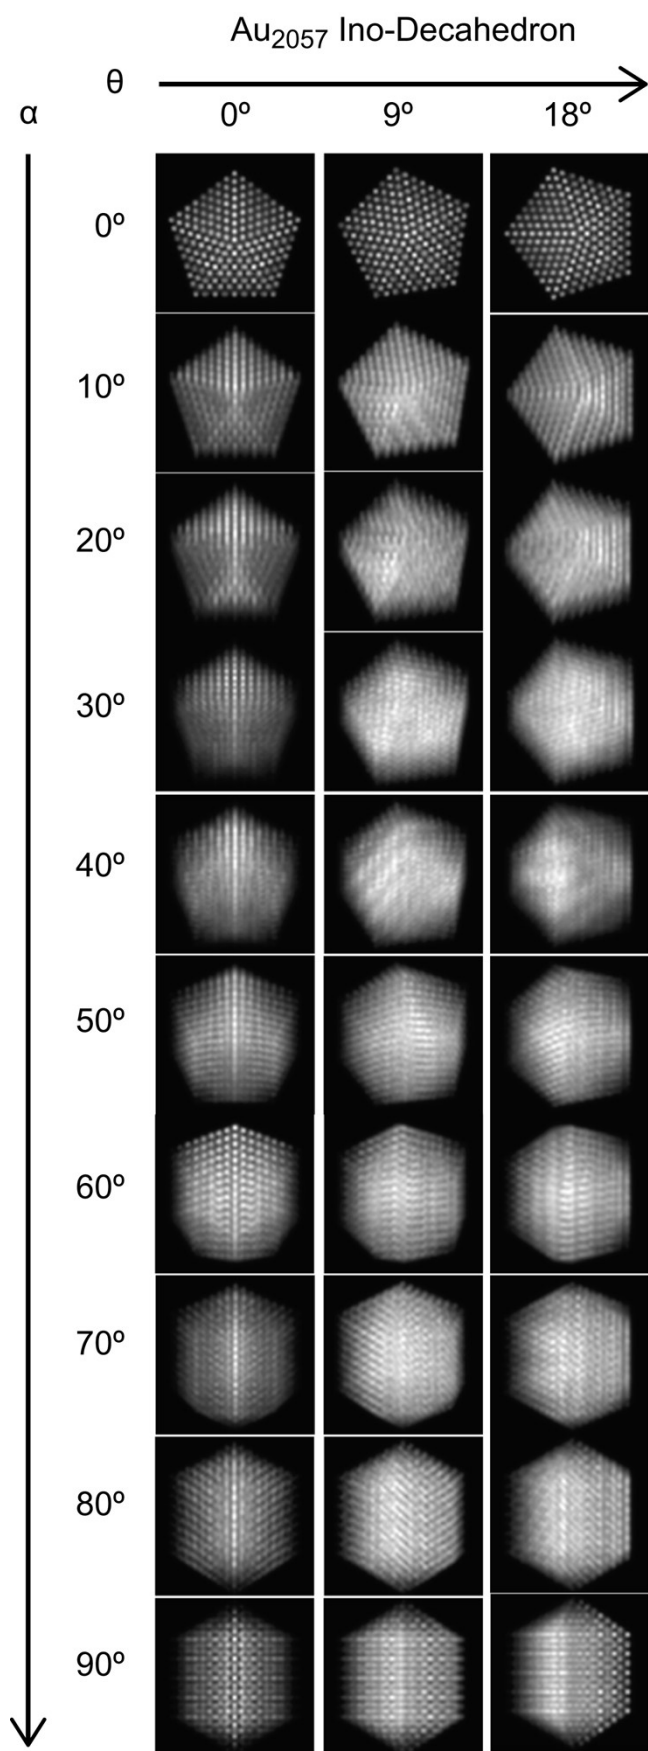

**Figure S5.** QSTEM simulated atlas of the  $\text{Au}_{2057}$  decahedron (Dh)

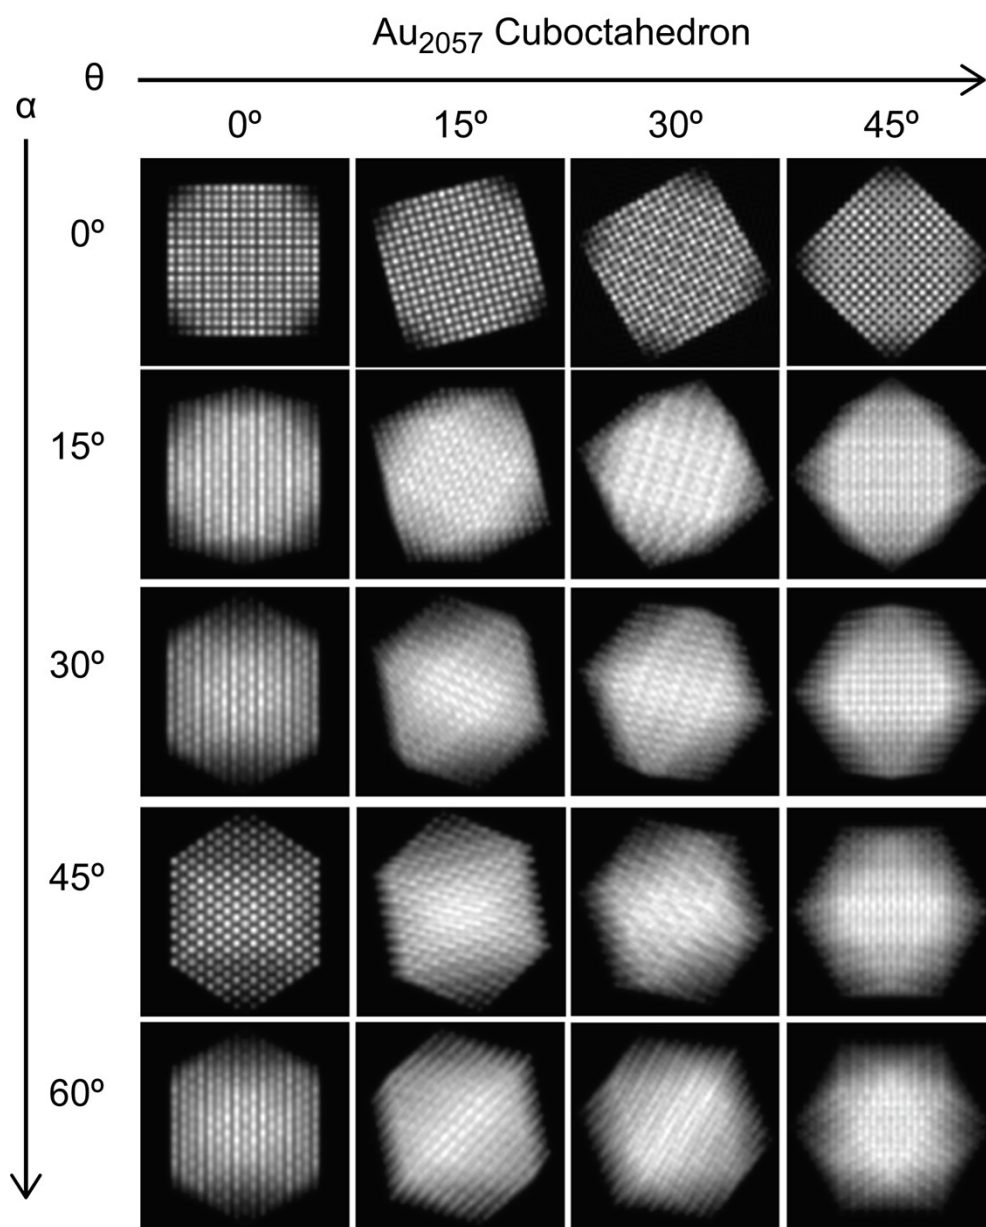

**Figure S6.** QSTEM simulated atlas of the  $\text{Au}_{2057}$  face-centered cubic (FCC) structure.



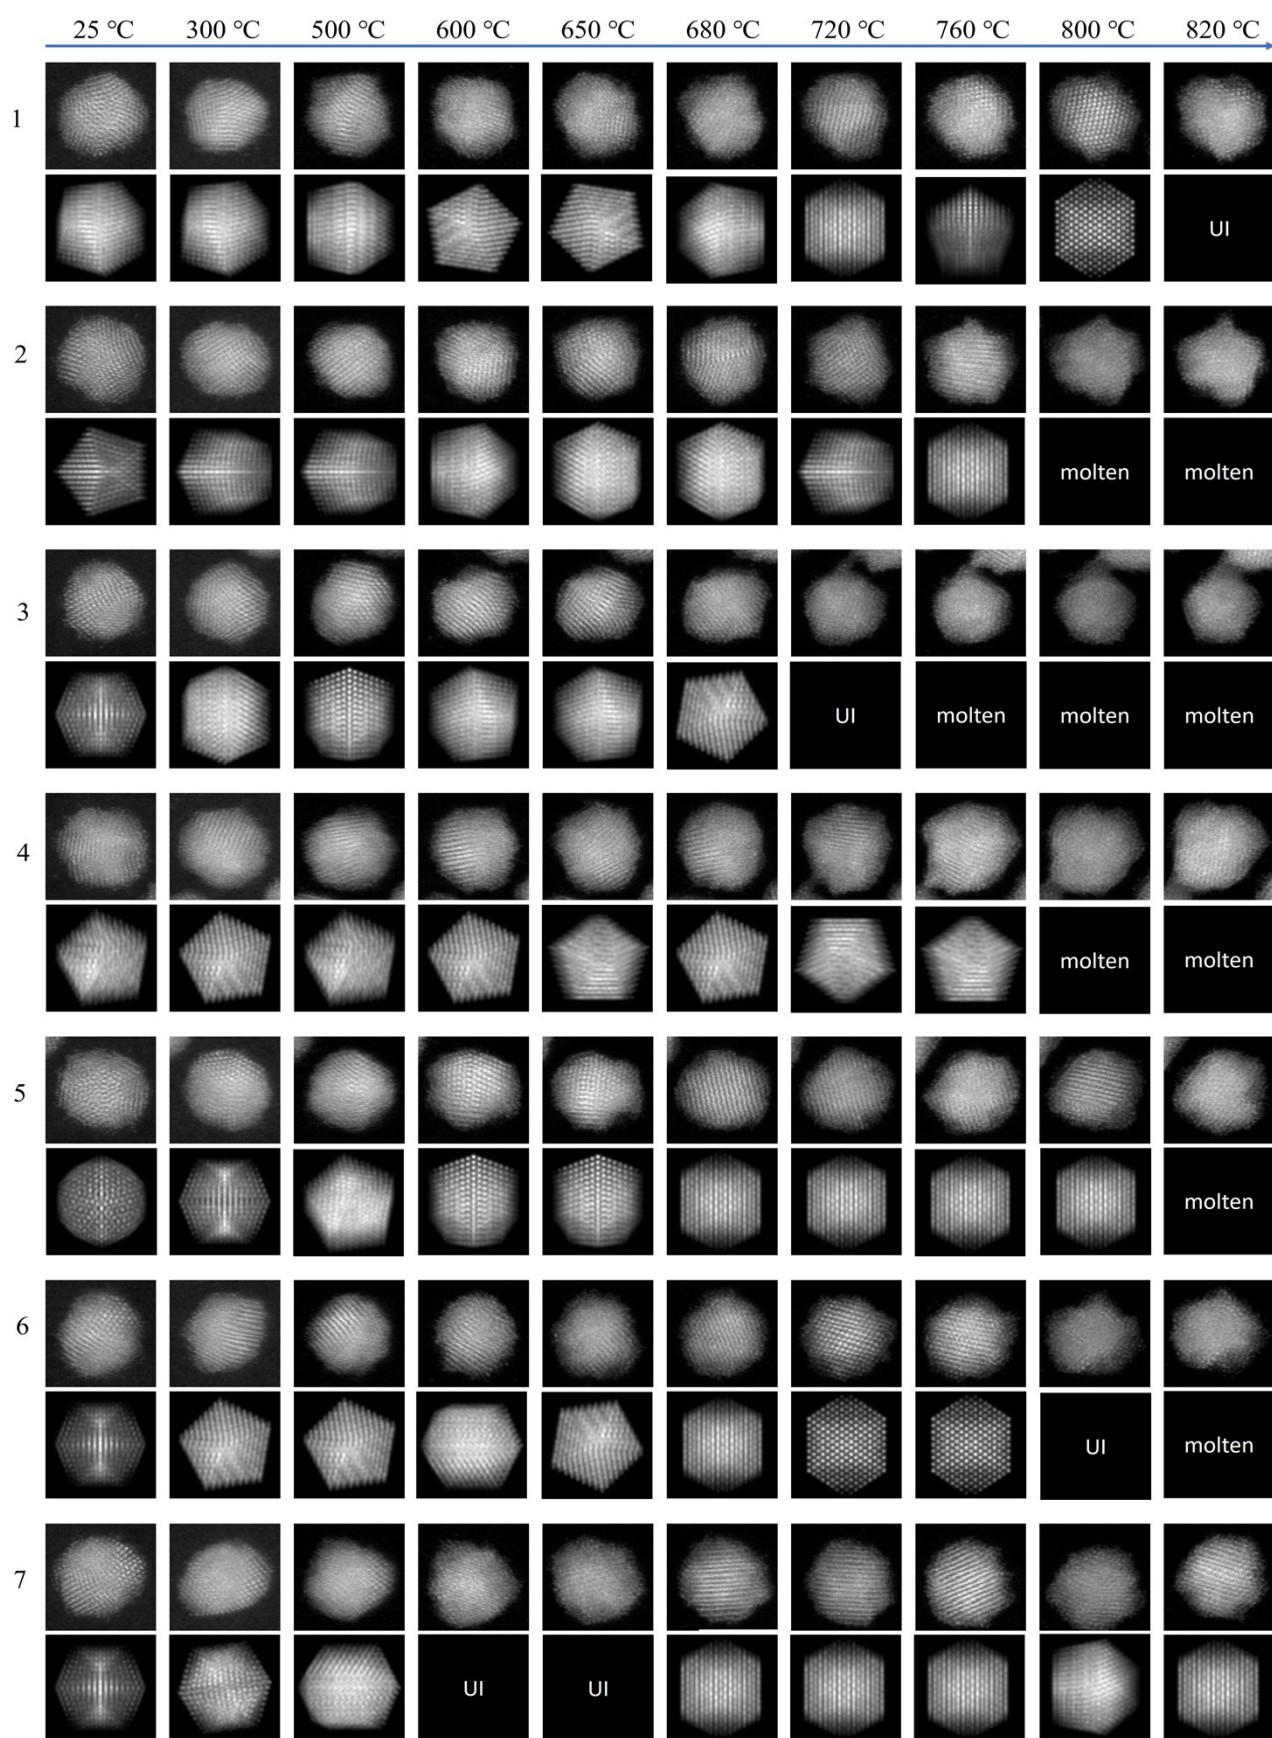

**Figure S7.** Representative HAADF-STEM images of the Au<sub>2057</sub> clusters and the corresponding QSTEM multi-slice image simulations at each temperature.

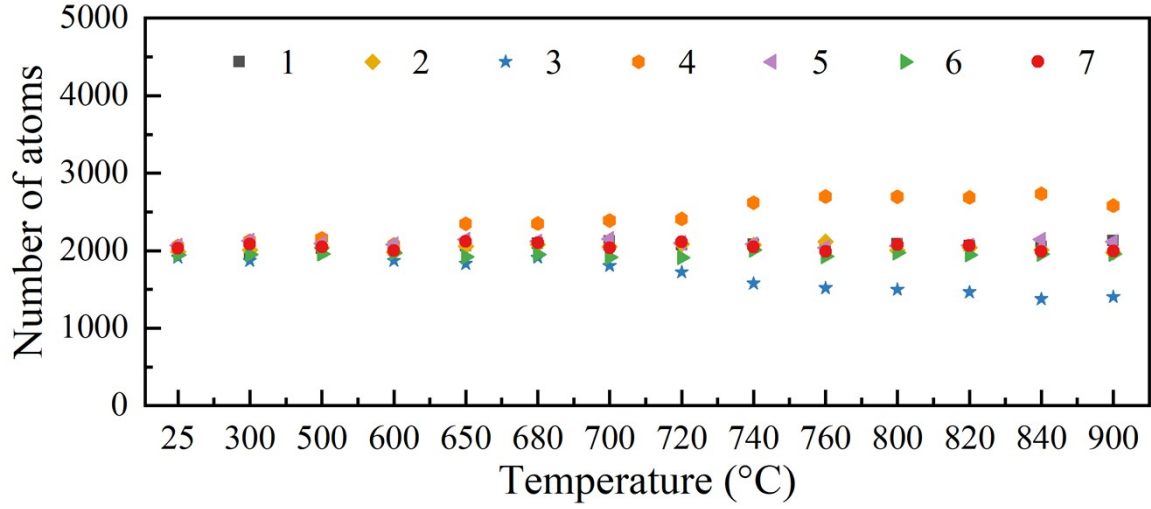

**Figure S8.** Variation in the atom counts of the  $\text{Au}_{2057\pm 51}$  clusters versus the temperature during the in-situ heating process.

## Melting models

Pawlow's Model:<sup>1,2</sup>

$$T_m = T_0 \left( 1 - \frac{2V_s}{rH_m} \left( \sigma_s - \sigma_l \left( \frac{\rho_s}{\rho_l} \right)^{2/3} \right) \right)$$

Thomson's model:<sup>3,4</sup>

$$T_m = T_0 \left( 1 - \frac{2(\sigma_s - \sigma_l)V_s}{rH_m} \right)$$

The liquid shell model:<sup>5-8</sup>

$$T_m = T_0 \left( 1 - \frac{2V_s}{H_m} \left( \frac{\sigma_s - \sigma_l}{r-t} + \frac{\sigma_l}{r} \left( 1 - \left( \frac{\rho_s}{\rho_l} \right)^{2/3} \right) \right) \right)$$

The lower boundary of the LNG model:<sup>9</sup>

$$T_{m-lb} = T_0 \left( 1 - \frac{3(\sigma_s - \sigma_l)V_x}{rH_m} \right)$$



The upper limit is given by the Gibbs- Thomson equation:<sup>9</sup>

$$T_{m-ub} = T_0 \left( 1 - \frac{2(\sigma_s - \sigma_l)V_s}{rH_m} \right)$$

The critical radius in the LNG model is given by:<sup>9</sup>

$$r_c = \frac{2(\sigma_s - \sigma_l)V_s T_0}{H_m(T_0 - T)}$$

**Table S1.** Constants used for plotting the melting models in Figure 6

| Symbol     | Meaning                       | Value                  | Unit                | Reference |
|------------|-------------------------------|------------------------|---------------------|-----------|
| $T_0$      | Bulk melting temperature      | 1064.18                | °C                  | 10,11     |
| $V_s$      | Molar volume of the solid     | $1.021 \times 10^{-5}$ | m <sup>3</sup> /mol | 12        |
| $H_m$      | Molar latent heat             | 12552                  | J/mol               | 10,11     |
| $\sigma_s$ | Surface tension of the solid  | 1.4                    | J/m <sup>2</sup>    | 13,14     |
| $\sigma_l$ | Surface tension of the liquid | 1.135                  | J/m <sup>2</sup>    | 13,14     |
| $\rho_s$   | Mass density of the solid     | 19300                  | kg/m <sup>3</sup>   | 12        |
| $\rho_l$   | Mass density of the liquid    | 17310                  | kg/m <sup>3</sup>   | 12        |

#### References

- 1 A. Barybin and V. Shapovalov, Modification of Pawlow's thermodynamical model for the melting of small single-component particles, *Journal of Applied Physics*, 2011, **109**. DOI: 10.1063/1.3544468.
- 2 P. Pawlow, The dependency of the melting point on the surface energy of a solid body, *Z. phys. Chem*, 1909, **65**, 545–548.
- 3 J. J. Thomson, *Applications of dynamics to physics and chemistry*, Macmillan, 1888.
- 4 G. Kaptay, The Gibbs equation versus the Kelvin and the Gibbs-Thomson equations to describe nucleation and equilibrium of nano-materials, *Journal of nanoscience and nanotechnology*, 2012, **12**, 2625–2633.
- 5 H. REISS and I. B. WILSON, The effect of surface on melting point, *Journal of colloid science*, 1948, **3**, 551–561.
- 6 N. D. Lisgarten, J. R. Sambles and L. M. Skinner, Vapour pressure over curved surfaces-the Kelvin equation, *Contemporary Physics*, 1971, **12**, 575–593.
- 7 R. Kofman, P. Cheyssac, A. Aouaj, Y. Lereah, G. Deutscher, T. Ben-David, J. M. Penisson and A. Bourret, Surface melting enhanced by curvature effects, *Surface Science*, 1994, **303**, 231–246.
- 8 K.-J. Hanszen, Theoretische Untersuchungen ber den Schmelzpunkt kleiner Kgelchen, *Z. Physik*, 1960, **157**, 523–553.

- 9 P. R. Couchman and W. A. Jesser, Thermodynamic theory of size dependence of melting temperature in metals, *Nature*, 1977, **269**, 481–483.
- 10 Collaboration: Scientific Group Thermodata Europe (SGTE), Thermodynamic Properties of Elements, Ac to C60, *Pure Substances. Part 1 \_ Elements and Compounds from AgBr to Ba3N2*, 1999, 1–24.
- 11 G. Guenther and O. Guillon, Models of size-dependent nanoparticle melting tested on gold, *J Mater Sci*, 2014, **49**, 7915–7932.
- 12 Technical data for the element Gold in the Periodic Table, <https://periodictable.com/Elements/079/data.html>, (accessed 25 April 2024).
- 13 P. Buffat and J.-P. Borel, Size effect on the melting temperature of gold particles, *Phys. Rev. A*, 1976, **13**, 2287–2298.
- 14 J. R. Sambles, An electron microscope study of evaporating gold particles: the Kelvin equation for liquid gold and the lowering of the melting point of solid gold particles, *Proc. R. Soc. Lond. A*, 1971, **324**, 339–351.
